# Supplementary material for: Catalyst supports based on ZnO–ZnAl2O4 nanocomposites with enhanced selectivity and coking resistance in isobutane dehydrogenation
Source: Royal Society of Chemistry journal article supplement (doi:10.1039/d2dt02088b), 2022-01-01
Supplement: d2dt02088b1.pdf [file d2dt02088b1.pdf]

# Mesoporous catalyst supports based on ZnO–ZnAl<sub>2</sub>O<sub>4</sub> nanocomposites with enhanced selectivity and coking resistance in isobutane dehydrogenation

Anna N. Matveyeva<sup>a</sup>, Shamil O. Omarov<sup>a</sup>, Alexey V. Nashchekin<sup>b</sup>,

Vadim I. Popkov<sup>a</sup>, Dmitry Yu. Murzin<sup>c</sup>

<sup>a</sup>Laboratory of Materials and Processes for Hydrogen Energy, Ioffe Institute, Politekhnicheskaya ul. 28, St. Petersburg 194021, Russia

<sup>b</sup>Federal Joint Research Center "Material science and characterization in advanced technology", Ioffe Institute, Politekhnicheskaya ul. 26, St. Petersburg 194021, Russia

<sup>c</sup>Laboratory of Industrial Chemistry and Reaction Engineering, Åbo Akademi University, Henriksgatan 2, Turku/Åbo 20500, Finland

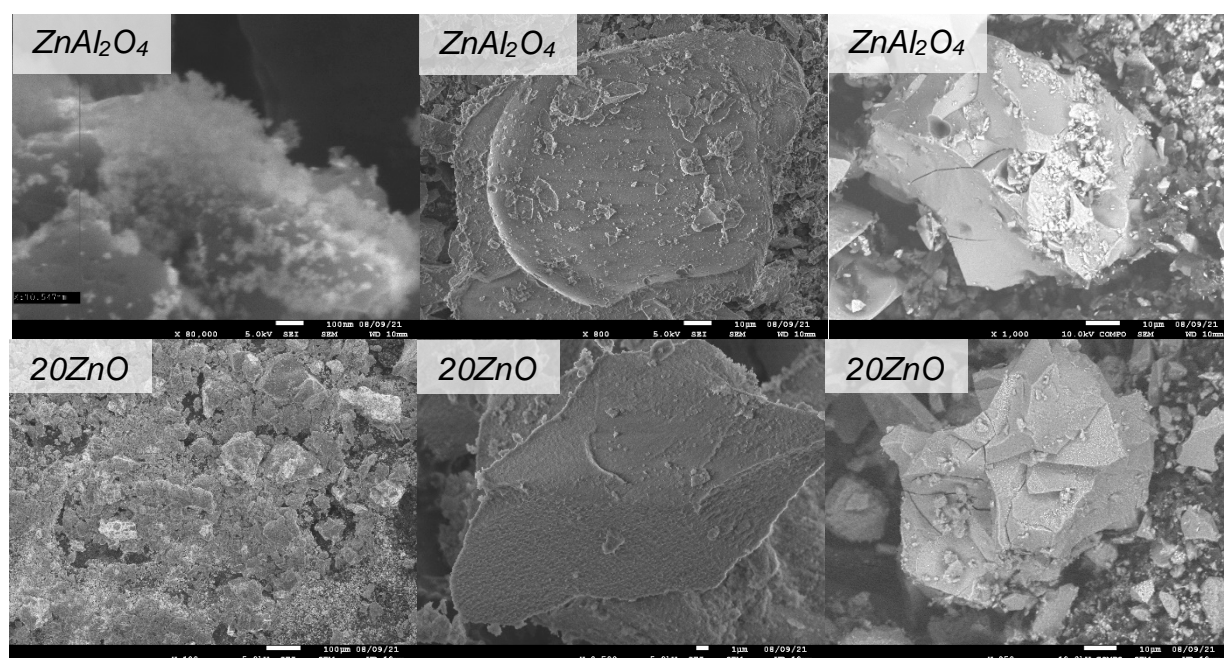

Figure S1. SEM images of the synthesized materials.

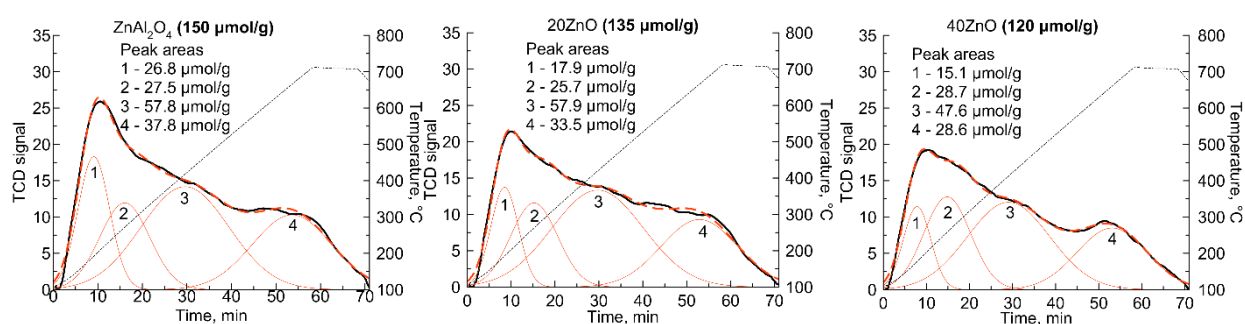

Figure S2. Multi-peak Gaussian fitting for the samples calcined at 700 °C.

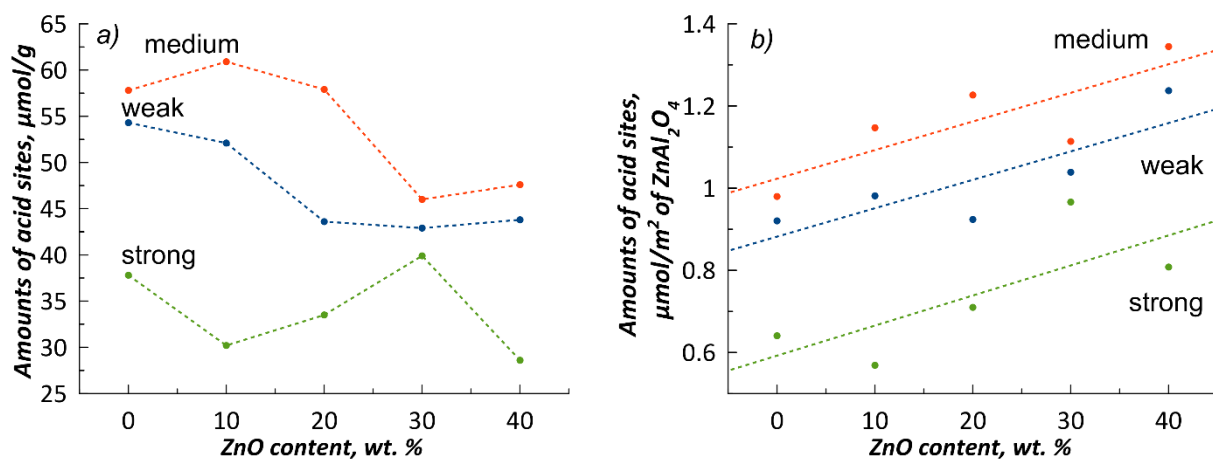

Figure S3. Acidity dependence of weak, medium, and strong acid sites on the ZnO content for the samples calcined at 700 °C.

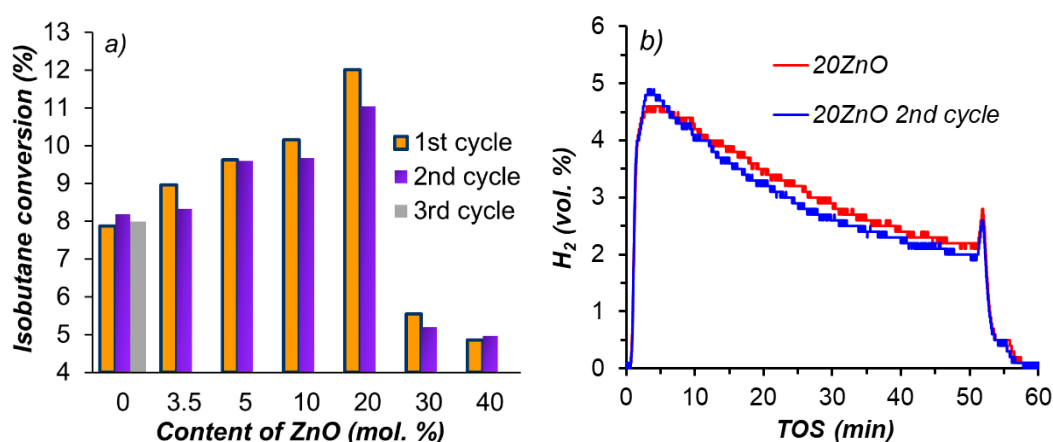

Figure S4. Isobutane conversion depending on the ZnO content, obtained after 10 min of dehydrogenation in the 1<sup>st</sup>, 2<sup>nd</sup> and 3<sup>rd</sup> cycle (full cycle: dehydrogenation 50 min – helium purge – air regeneration – helium purge) (a); evolution of H<sub>2</sub> during isobutane dehydrogenation on 20ZnO–80ZnAl<sub>2</sub>O<sub>4</sub> (b). Reaction conditions: 550 °C, 20 ml/min of isobutane : He = 40 : 60.

Table S1. Isobutane conversion, space time yield (STY) of isobutene and isobutene selectivity. Reaction conditions: 550 °C, 10 min, iso-C<sub>4</sub>H<sub>10</sub>:N<sub>2</sub> = 40:60, contact time of 0.24 g·s·ml<sup>-1</sup>.

| Catalyst                                                                             | Conversion, % | Selectivity to iso-C <sub>4</sub> H <sub>8</sub> , mol. % | STY, kg/(h·m <sup>3</sup> ) | Reference |
|--------------------------------------------------------------------------------------|---------------|-----------------------------------------------------------|-----------------------------|-----------|
| 20ZnO–80ZnAl <sub>2</sub> O <sub>4</sub>                                             | 12            | 95                                                        | 1704                        | This work |
| Cr <sub>10</sub> Zr <sub>90</sub> O <sub>x</sub>                                     | 36            | 81                                                        | 5861                        | [38]      |
| Cr <sub>2</sub> O <sub>3</sub> /Al <sub>2</sub> O <sub>3</sub>                       | 7             | 92                                                        | 950                         | This work |
| Note: STY = mass flow of isobutene (kg/h) / volume of the catalyst (m <sup>3</sup> ) |               |                                                           |                             |           |
